# Supplementary material
Source: publisher site journal article supplement (https://www.spandidos-publications.com/4484/downloadSupplementary)

Figure S1. GO and KEGG pathway analysis of DEGs. (A) GO and (B) KEGG enriched processes and pathways of the differentially upregulated genes are listed as a bubble chart. (C) GO and (D) KEGG enriched processes and pathways of the differentially downregulated genes is listed as a bubble chart. GO, Gene Ontology; KEGG, Kyoto Encyclopaedia of Genes and Genomes.

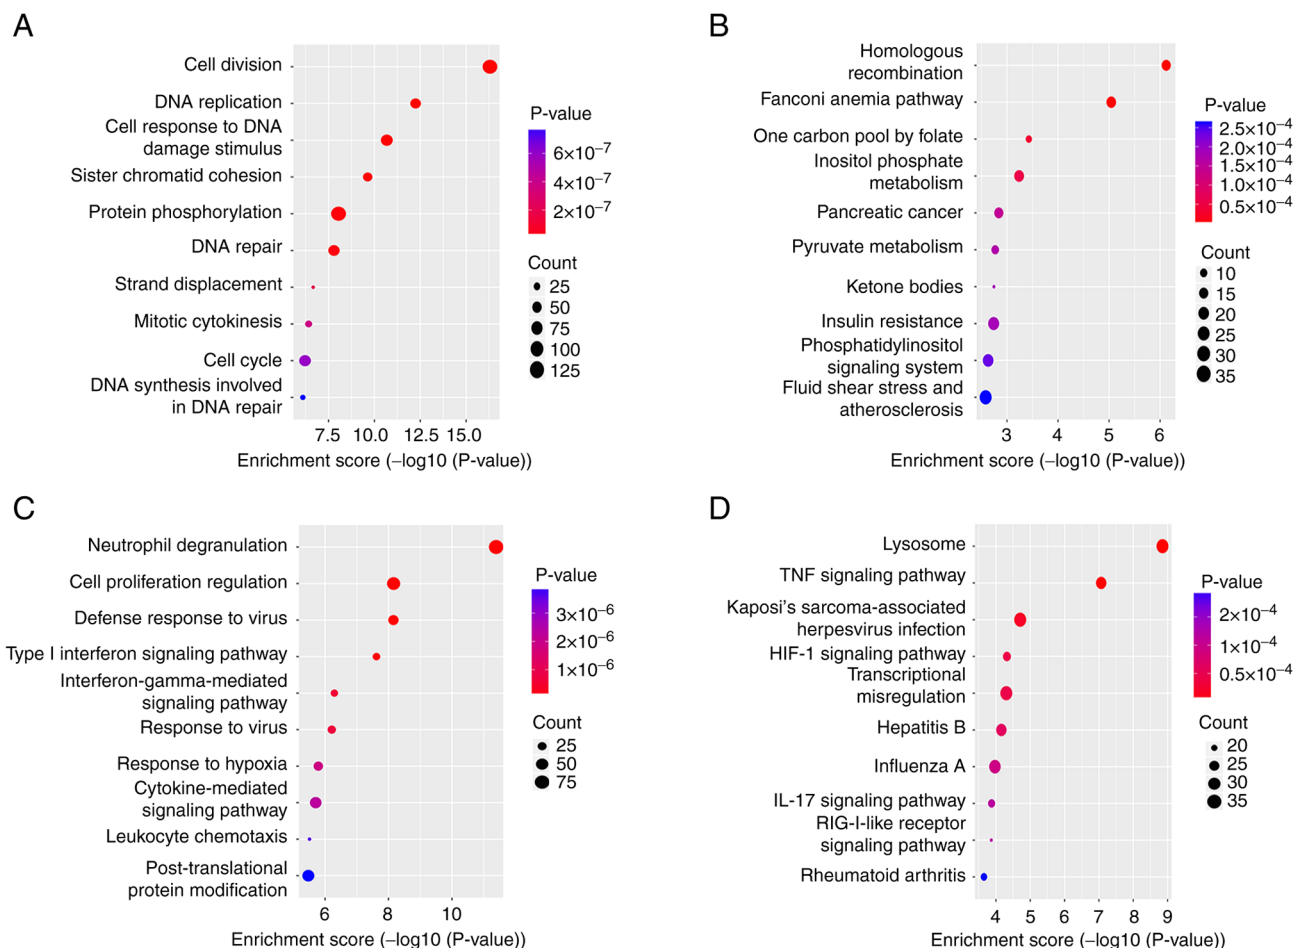

Figure S2. Immunoprecipitated proteins from the anti-IgG and anti-TRPC5OS groups determined using a Fast Silver Stain Kit. TRPC5OS, Transient receptor potential channel 5 opposite strand.

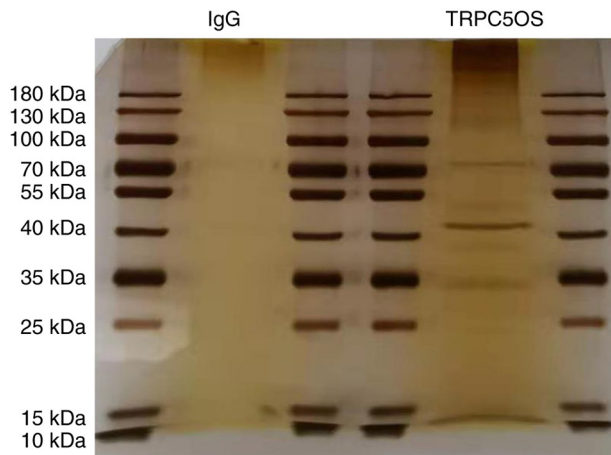

Supplement: Supplementary file 1 [file downloadSupplementary]
